# Supplementary material for: Golgi Oncoprotein GOLPH3 Gene Expression Is Regulated by Functional E2F and CREB/ATF Promoter Elements
Source: PubMed Central journal article supplement (PMC6471639; doi:10.3390/genes10030247), 2019-03-25
Supplement: genes-10-00247-s001.pdf [file genes-10-00247-s001.pdf]

## Supplementary information

To accompany Peñalver-González, Vallejo-Rodríguez et al., "Golgi Oncoprotein *GOLPH3* Gene Expression is Regulated by Functional E2F and CREB/ATF Promoter Elements "

### Figure Legends

**Supplementary Figure 1.** Schematic representation of promoters of genes encoding Golgi proteins. E2F and CREB/ATF transcription factor-binding sites in human *GOLGA2*, *GOLGA5* and *MAN2A1* regulatory regions (-500 to +234) are indicated as boxes. The transcriptional start site is depicted with an arrow.

**Supplementary Figure 2.** Graphical representation of E2F transcription factor binding to the promoter regions of indicated genes. H3K27Ac enhancer marks are also included for each gene.

**Supplementary Figure 3.** Sequence alignment of the E2F and CREB/ATF regulatory elements in *GOLPH3* promoter across species. Sequences of the human, chimpanzee, mouse, rat and cow *GOLPH3* promoters are depicted. The asterisk denotes an identical nucleotide in all species tested. Lowercase letter denotes a non-transcribed sequence; uppercase letter denotes a transcribed sequence.

# SUPPLEMENTARY FIGURE 1

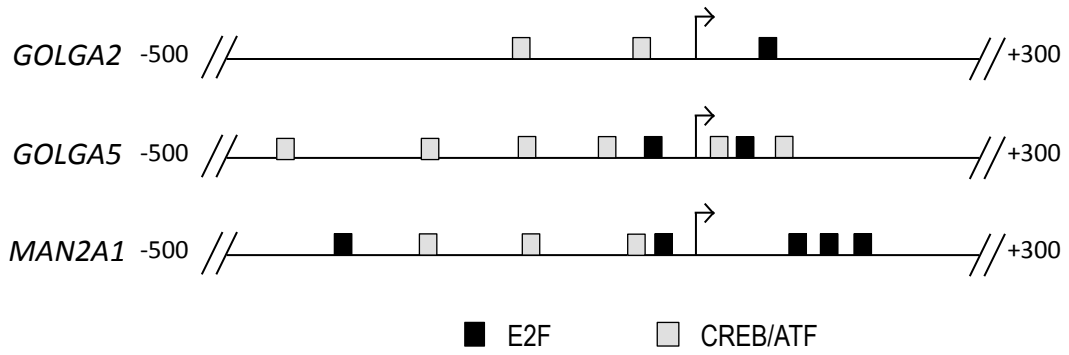

# SUPPLEMENTARY FIGURE 2

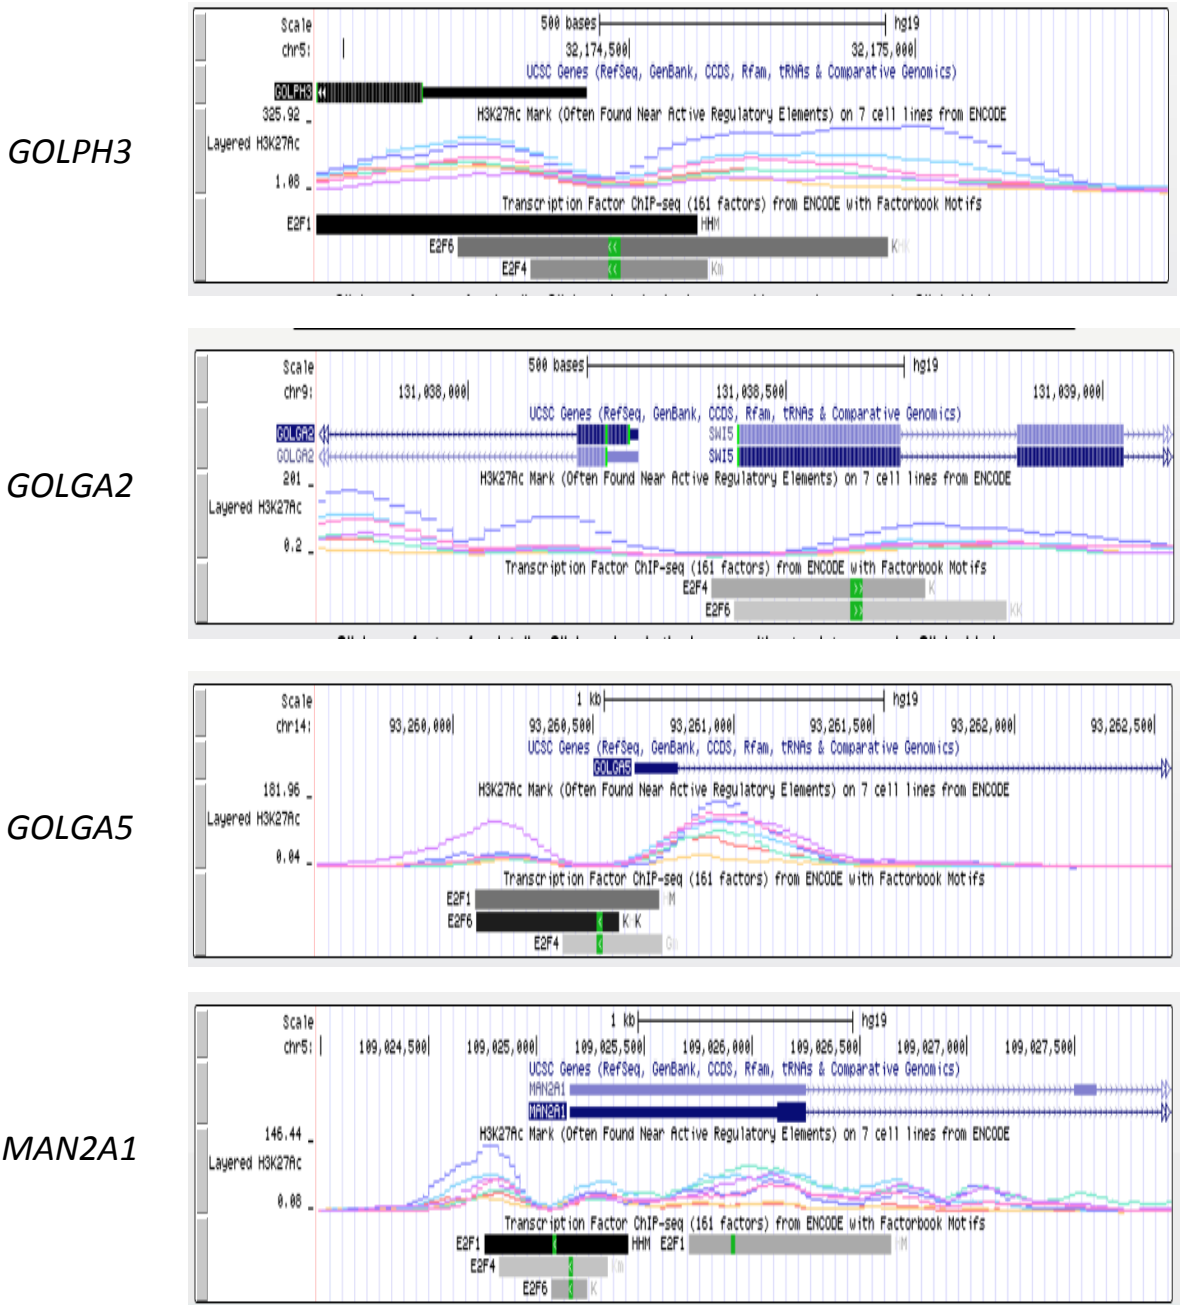

### SUPPLEMENTARY FIGURE 3

|                  | CREB/ATF     | E2F      | E2F      | CREB/ATF           | CREB/ATF    |
|------------------|--------------|----------|----------|--------------------|-------------|
| GOLPH3_Human     | cacgtcacggga | acgccaaa | ctcccgcg | TCCGGTGACGTCAGCCGG | GACTGCCCCCG |
| Golph3_Chimpazee | CACGTCACGGGA | ACGCCAAA | CTCCCGCG | TCCGGTGACGTCAGCCGG | GACTGCCCCCG |
| Golph3_Mouse     | gaactgagaggc | -----    | gccccgcg | tccggtgacgtcagcgcg | GACCGCCTTCG |
| Golph3_Rat       | gaactgtgaggc | -----    | gccccgcg | tccggtgacgtcaacgcg | gactgccttcg |
| Golph3_Cow       | cacgtcacggga | actctaag | gccccgcg | tccagtgacgtcagcgcg | GACTGCATCCA |
|                  | * * **       | ** * **  | *****    | *** ***** * *      | ***** *     |

**Supplementary Table S1:** Nucleotide sequences of primers used for construction of deletion mutants of *GOLPH3* promoter

| Primer             | Sequence                                  | R.E.*<br>added | Size<br>(bp) |
|--------------------|-------------------------------------------|----------------|--------------|
| pGL2-G3P-WT_F      | TGC AGA CGC GTC CCA GGC TCT TCC ATT CAC   | MluI           | 488          |
| pGL2-G3P-WT_R      | TGC AGA AGC TTR CCG GGT TTC CGT GTT AAA T | HindIII        |              |
| pGL2-G3P-<br>ΔUR_F | TGC AGA CGC GTC CCA GGC TCT TCC ATT CAC   | MluI           | 281          |
| pGL2-G3P-<br>ΔUR_R | TGC AGA AGC TTG ATG TGG CAG AGT CG        | HindIII        |              |
| pGL2-G3P-<br>ΔDR_F | TGC AGA CGC GTT GCC ACA TCC TCC GGT GAC   | MluI           | 260          |
| pGL2-G3P-<br>ΔDR_R | TGC AGA AGC TTT CCG GGT TTC CGT GTT       | HindIII        |              |
| pGL2-G3P-MR_F      | TGC AGA CGC GTC GGG GAC TGC GGC CAC       | MluI           | 176          |
| pGL2-G3P-MR_R      | TGC AGA AGC TTT CCG GGT TTC CGT GTT       | HindIII        |              |

\* R.E., restriction endonuclease

**Supplementary Table S2:** Nucleotide sequences of primers used for construction of E2F and CREB/ATF motif mutants of *GOLPH3* promoter

| Primer                                                   | Sequence                                               |
|----------------------------------------------------------|--------------------------------------------------------|
| pGL2-G3P-E2F Mutants (E2F Mut1, E2F Mut2, E2F Mut1-2)_F1 | GGG GGC GCA GGA cCa CtA gAG AAA AGA CAA GCA CCG AGG    |
| pGL2-G3P-E2F Mutants (E2F Mut1, E2F Mut2, E2F Mut1-2)_F2 | GCC TCC CGG CCC AGC TCg Cat GtG aCG ACT CTG CCA CAT    |
| pGL2-G3P-CREB Mut_F                                      | TCC TCC GGT cca tgC AGC CGG GGC CGC CAT ATT GGAAAG GCG |
| pGL2-G3P-CREB Mut_R                                      | GTT GCC ACA TCC TCC GGT cca tgC AGC CGG GGC CGC CAT    |

**Supplementary Table S3:** Nucleotide sequences of primers used for RT-QPCR experiments

| Primer      | Sequence                      |
|-------------|-------------------------------|
| qH_GOLPH3_F | CTG GAT TAC GTG GCT GTA TGT   |
| qH_GOLPH3_R | CCT GTT GGA GCA TCT GAC TT    |
| qH_GOLGA2_F | ACG GAT CAG TTG GAA GAA GAA A |
| qH_GOLGA2_R | GGA TCC CTA TGG TCT GAA TGT G |
| qH_MAN2A1_F | TGG TGC CTC ATT CCC ATAAC     |
| qH_MAN2A1_R | CTT CCT CCG TGA GTC TTC TTT C |
| qH_GOLGA5_F | GCA GAG GGA GGA AAT ACA GAA G |
| qH_GOLGA5_R | ACT TGC TGT GCC TCC ATA TC    |
| qH_EIF2C2_F | GTC CCT TTT GAG ACG ATC CAG   |
| qH_EIF2C2_R | AGC CAA ACC ACA CTT CTC G     |
